# Supplementary material
Source: publisher figshare collection journal article supplement (https://frontiersin.figshare.com/ndownloader/files/14101526)
Supplement: Supplementary file [file 14101526]

**Table S6. Ingenuity Pathway Analysis of differentially expressed genes between CD8+XCR1neg and CD8+XCR1+ DC**

Pathway and network analysis was carried out using Ingenuity pathway Analysis with genes up- or down-regulated with a FC>5 and adj. P-value<0.05

**Ingenuity Pathway Analysis**

| Term                                                                           | Overlap | Gene Symbols                                                                  | Adjusted P-value |
|--------------------------------------------------------------------------------|---------|-------------------------------------------------------------------------------|------------------|
| Communication between Innate and Adaptive Immune Cells                         | 9/63    | Tlr11, TLR4, TLR5, IL12B, CD4, TLR7, TLR3, CD8B, Ccl9                         | 3.63E-05         |
| LXR/RXR Activation                                                             | 10/108  | IL1R2, TLR4, IL1RL2, CD36, SERPINF1, IL1R1, PLTP, PTGS2, TLR3, APOD           | 2.24E-04         |
| Granulocyte Adhesion and Diapedesis                                            | 10/151  | IL1R2, SELL, IL1RL2, PECAM1, CCL17, IL1R1, SDC4, MMP12, Cxcl9, Ccl9           | 2.95E-03         |
| Altered T Cell and B Cell Signaling in Rheumatoid Arthritis                    | 7/110   | Tlr11, TLR4, CD79B, TLR5, IL12B, TLR7, TLR3                                   | 4.68E-03         |
| phagosome formation                                                            | 8/109   | MRC1, Tlr11, TLR4, PLCE1, TLR5, TLR7, TLR3, PRKCA                             | 5.37E-03         |
| Crosstalk between Dendritic Cells and Natural Killer Cells                     | 6/68    | TLR4, CD209, KLRD1, IL12B, TLR7, TLR3                                         | 1.23E-02         |
| Colorectal Cancer Metastasis Signaling                                         | 11/242  | Tlr11, TLR4, CDH1, TCF4, TLR5, ADCY4, TLR7, PTGER2, PTGS2, TLR3, M            | 1.35E-02         |
| NF-kB Signaling                                                                | 9/168   | IL1R2, TLR4, TLR5, TLR7, IL1R1, TLR3, KDR, IGF2R, DDR1                        | 1.35E-02         |
| Role of Macrophages, Fibroblasts and Endothelial Cells in Rheumatoid Arthritis | 12/296  | IL1R2, Tlr11, TLR4, TCF4, PLCE1, IL1RL2, TLR5, TLR7, DKK2, IL1R1, TLR3, PRKCA | 1.78E-02         |
| Hepatic Cholestasis                                                            | 8/149   | IL1R2, TLR4, CYP7B1, IL1RL2, IL12B, ADCY4, IL1R1, PRKCA                       | 2.24E-02         |
| Agranulocyte Adhesion and Diapedesis                                           | 8/180   | SELL, PECAM1, CCL17, IL1R1, SDC4, MMP12, Cxcl9, Ccl9                          | 3.16E-02         |
| Role of Pattern Recognition Receptors in Recognition of Bacteria and Viruses   | 7/127   | Tlr11, TLR4, TLR5, IL12B, TLR7, TLR3, PRKCA                                   | 3.31E-02         |
| TREM1 Signaling                                                                | 5/68    | Tlr11, TLR4, TLR5, TLR7, TLR3                                                 | 4.17E-02         |
| Toll-like Receptor Signaling                                                   | 5/70    | TLR4, TLR5, IL12B, TLR7, TLR3                                                 | 4.37E-02         |
| Natural Killer Cell Signaling                                                  | 6/105   | LAI1, KLRD1, Klrp7, SH2D1B, CD300A, PRKCA                                     | 4.79E-02         |
| B Cell Development                                                             | 3/22    | IL7R, CD79B, DNTT                                                             | 4.79E-02         |
